# Supplementary material for: Galectin-3 alters the lateral mobility and clustering of β1-integrin receptors
Source: PubMed Central journal article supplement (PMC5634555; doi:10.1371/journal.pone.0184378), 2017-10-10
Supplement: pone.0184378.s001.pdf [file pone.0184378.s001.pdf]

**Supporting information for:**

**Galectin-3 alters the lateral mobility and clustering of**

**$\beta$ 1-integrin receptors**

Esther H. Yang, Julia Rode<sup>†</sup>, Md. Amran Howlader, Marina Eckermann<sup>¶</sup>, Jobette T. Santos<sup>‡</sup>, Daniel Hernandez Armada, Ruixiang Zheng, Chunxia Zou, and Christopher W. Cairo\*

**Contents**

|                                                                                           |   |
|-------------------------------------------------------------------------------------------|---|
| Preparation of Gal-3 and Gal-3C proteins .....                                            | 2 |
| Table A: Shotgun proteomics of HeLa cell lysate .....                                     | 3 |
| Table B: Cluster Analysis of integrins by TIRF .....                                      | 4 |
| Table C: Lateral mobility osmotic controls .....                                          | 4 |
| Table D: Cytotoxicity osmotic controls .....                                              | 4 |
| Fig A: Galectin-3C induces clustering of integrin receptors on cells. ....                | 5 |
| Fig B: Lateral mobility of integrins with NanI and Gal-3C treatments .....                | 6 |
| Fig C: Changes in glycosylation to $\alpha$ 5 $\beta$ 1 integrin with NEU treatment ..... | 7 |
| References .....                                                                          | 8 |

### *Preparation of Gal-3 and Gal-3C proteins*

The genes of the full length human galectin-3 (Gal-3) or the C-terminal fragment (Gal-3C, residues 107-250) were optimized and synthesized by Genscript Inc. and then subcloned into a *pET30b* vector. The Gal-3C protein was overproduced in *E.coli* BL21 (DE3), following previous reports.<sup>1</sup> A single colony was used for inoculation of an overnight culture in LB medium. Bacterial growth was monitored by absorbance at 600 nm ( $A_{600}$ ). At  $A_{600} \sim 0.6$ , the culture was induced by adding IPTG to a final concentration of 1 mM, followed by culture overnight, and centrifugation at 20 °C. The cell pellets were resuspended in MEPBS (1 × PBS, pH 7.2, 2 mM  $\beta$ -mercaptoethanol, 4 mM EDTA) and lysed using a cell disruptor. The lysate was centrifuged at 100,000 x g, and the supernatant was loaded onto an equilibrated lactosyl-Sepharose column.<sup>2</sup> The column was washed with MEPBS, and eluted with MEPBS containing 200 mM lactose. The eluant was dialyzed into PBS buffer before experiments, or stored at -80 °C. The nucleotide sequences for each protein are given below.

#### **Gal-3 nucleotide sequence**

```
ATGGCAGATAACTTCTCGCTGCATGACGCACTGTCTGGGCTCGGGTAATCCGAATCCGCAGGGCTG
GCCGGGCGCTTGGGGTAATCAACCGGCAGGTGCCGGCGGTTATCCGGGTGCTTCTTATCCGGGCG
CATACCCGGGTGTCAGGCTCCGCCGGGTGCATACCCGGGTCAAGCACCGCCGGGTGCATATCCGGGT
GCACCGGGTGCTTACCCGGGTGCACCGGCTCCGGGTGTGTATCCGGGTCCGCCGTCAGGCCCGGG
TGCTTACCCGAGCTCTGGTCAAGCGTCCGGCAACCGGTGCATATCCGGCAACGGGTCCGTACGGTG
CACCGGCAGGTCCGCTGATTGTTCCGTATAACCTGCCGCTGCCGGGCGGTGTGGTTCCGCGTATG
CTGATTACCATCCTGGGCACGGTCAAACCGAACGCTAATCGTATTGCGCTGGATTTTCAACGCGG
TAACGACGTGGCGTTTCATTTCAACCCGCGCTTCAATGAAAACAATCGTCGCGTCATCGTGTGCA
ATACCAAACCTGGATAACAATTGGGGCCGTGAAGAACGCCAGAGTGTTTTTCCGTTCGAATCCGGT
AAACCGTTTTAAAATCCAAGTTCTGGTCAACCGGATCACTTCAAAGTGGCCGTTAATGACGCACA
TCTGCTGCAGTATAACCACCGTGTCAAAAACTGAATGAAATTAGTAAACTGGGCATTTCTGGCG
ACATTGACCTGACCTCGGCGTCTACACGATGATTTAATGA
```

#### **Gal-3C nucleotide sequence**

```
ATGTATGGCGCTCCGGCTGGTCCGCTGATTGTTCCGTACAACCTGCCGCTGCCGGGTGGCGTCGT
CCC GCGTATGCTGATTACCATCCTGGGCACCGTGAAACCGAACGCGAATCGTATTGCCCTGGATT
TTCAGCGCGGTAACGACGTTGCCTTTCATTTCAACCCGCGTTTCAATGAAAACAATCGTCGCGTG
ATCGTTTGCAATACGAAACTGGATAACAATTGGGGCCGTGAAGAACGCCAGAGCGTCTTTCCGTT
CGAATCTGGTAAACCGTTTTAAAATTCAAGTCTGGTGGAAACCGGATCACTTCAAAGTTGCAGTCA
ACGACGCTCATCTGCTGCAATATAACCACCGCTTAAAAACTGAATGAAATCAGTAAACTGGGC
ATTAGCGGTGACATTGACCTGACCTCGGCGTCTACACGATGATTTGATGA
```

### Gal-3 protein sequence

MADNFSLHDALSGSGNPNPQGWPGAWGNQPAGAGGYPGASYPGAYPGQAPPGAYPGQAP  
PGAYPGAPGAYPGAPAPGVYPGPPSGPGAYPSSGQPSATGAYPATGPY GAPAGPLIVPY  
NLPLPGGVVPRMLITILGTVKPNANRIALDFQRGNDVAFHFNPRFNENRRVIVCNTKL  
DNNWGREERQSVFPFESGKPFKIQVLVEPDHFKVAVNDAHLLQYNHRVKKLNEISKLGI  
SGDIDLTSASYTMI

### Gal-3C protein sequence

MYGAPAGPLIVPYNLPLPGGVVPRMLITILGTVKPNANRIALDFQRGNDVAFHFNPRFN  
ENRRVIVCNTKLDNNWGREERQSVFPFESGKPFKIQVLVEPDHFKVAVNDAHLLQYNH  
RVKKLNEISKLGISGDIDLTSASYTMI

Table A: Shotgun proteomics of HeLa cell lysate

| <b>Protein accession</b> | <b>LNnT<sup>†</sup></b> | <b>Lac<sup>†</sup></b> | <b>Seph<sup>†</sup></b> |
|--------------------------|-------------------------|------------------------|-------------------------|
| <i>ANXA2_HUMAN</i>       | 0                       | 35                     | 0                       |
| <i>H12_HUMAN</i>         | 360                     | 0                      | 0                       |
| <i>H13_HUMAN</i>         | 386                     | 0                      | 0                       |
| <i>H14_HUMAN</i>         | 372                     | 221                    | 0                       |
| <i>H15_HUMAN</i>         | 411                     | 203                    | 0                       |
| <i>H1T_HUMAN</i>         | 144                     | 0                      | 0                       |
| <i>H2B1C_HUMAN</i>       | 29                      | 42                     | 0                       |
| <i>LEG1_HUMAN</i>        | 22                      | 195                    | 0                       |
| <i>LEG3_HUMAN</i>        | 0                       | 190                    | 0                       |
| <i>RL23A_HUMAN</i>       | 0                       | 133                    | 0                       |
| <i>TCP4_HUMAN</i>        | 0                       | 67                     | 0                       |
| <i>YBOX1_HUMAN</i>       | 86                      | 46                     | 0                       |

<sup>†</sup> Mascot protein scores are shown for three separate experiments using affinity columns. Columns were either unmodified sepharose (Seph), Lac, or LNnT columns. See Materials and Methods for details.

Table B: Cluster Analysis of integrins by TIRF

| Condition      | n  | mean‡          | p†     |
|----------------|----|----------------|--------|
| control        | 12 | 0.42 ± 0.02    | -      |
| Gal-3C         | 11 | 0.65 ± 0.05*** | 0.0002 |
| Gal-3C + CytoD | 9  | 0.48 ± 0.09    | 0.52   |
| control (PBS)  | 15 | 0.33 ± 0.03    | -      |
| Lac            | 5  | 0.36 ± 0.03    | 0.50   |
| LNNt           | 7  | 0.37 ± 0.02    | 0.30   |
| CytoD          | 10 | 0.48 ± 0.05**  | 0.0057 |
| Gal-3+CytoD    | 9  | 0.45 ± 0.02**  | 0.0034 |
| Gal-3          | 7  | 0.6 ± 0.1*     | 0.0122 |

‡Mean area of clusters per cell ± SEM, [ $\mu\text{m}^2$ ]. n represents the number of individual cells.

†Data were compared to the appropriate control using a t-test to determine p values; \*,  $p \leq 0.05$ ; \*\*,  $p \leq 0.01$ ; \*\*\*,  $p \leq 0.005$ ; \*\*\*\*,  $p \leq 0.0001$ . Scale bar = 5  $\mu\text{m}$ .

Table C: Lateral mobility osmotic controls

| Condition     | n   | mean‡        | log mean‡    |
|---------------|-----|--------------|--------------|
| control (PBS) | 174 | 1.9 ± 0.3    | 0.8 ± 0.06   |
| Lac           | 213 | 2.2 ± 0.6    | 0.6 ± 0.04   |
| LNNt          | 135 | 3.7 ± 0.5*** | 1.3 ± 0.1*** |

‡, Units are [ $\times 10^{-10} \text{cm}^2 \text{sec}^{-1}$ ] or [ $\times 10^{-2} \mu\text{m}^2 \text{sec}^{-1}$ ].

\*, p values were calculated by comparison of two normal populations of raw or log-transformed data as indicated. Samples were compared to the indicated control for significance using a student's t-test. \*,  $p \leq 0.05$ ; \*\*,  $p \leq 0.01$ ; \*\*\*,  $p \leq 0.005$ ; \*\*\*\*,  $p \leq 0.0001$ .

†, Median values were calculated as described in supporting information.

Table D: Cytotoxicity osmotic controls

| Condition      | n  | mean        |
|----------------|----|-------------|
| control (PBS)  | 32 | 100 ± 14    |
| Lac 100 mM     | 32 | 61 ± 12**** |
| Sucrose 100 mM | 32 | 65 ± 9****  |

†Data were compared to the appropriate control using a t-test to determine p values; \*,  $p \leq 0.05$ ; \*\*,  $p \leq 0.01$ ; \*\*\*,  $p \leq 0.005$ ; \*\*\*\*,  $p \leq 0.0001$ . Scale bar = 5  $\mu\text{m}$ .

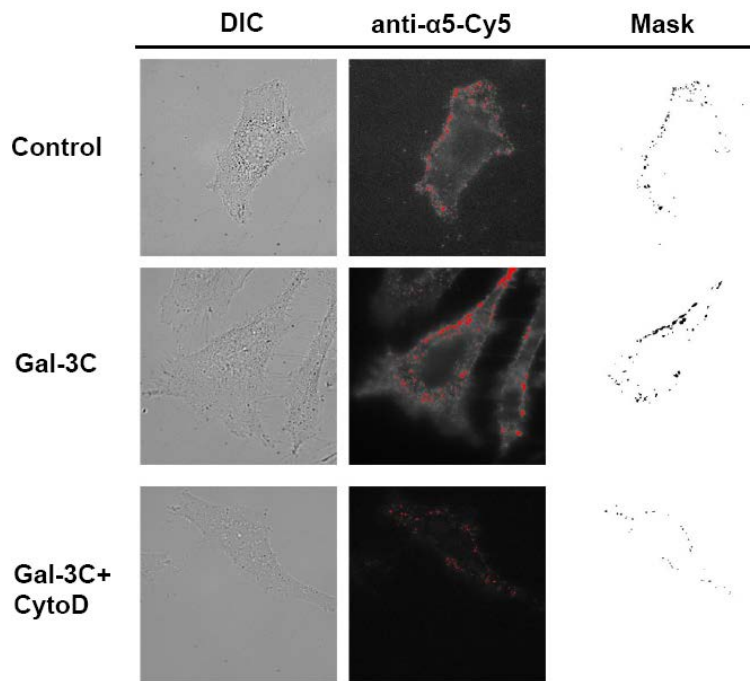

*Fig A: Galectin-3C induces clustering of integrin receptors on cells.*

Cells were stained using the same anti $\alpha$ 5-Cy5 conjugate employed for tracking experiments. Ten fields of stained cells were analyzed using ImageJ to identify clusters and measure their size. Sample images from each treatment are shown, and quantification of these images is shown in Fig 2. Galectin-3C resulted in an increase in the size of integrin clusters.

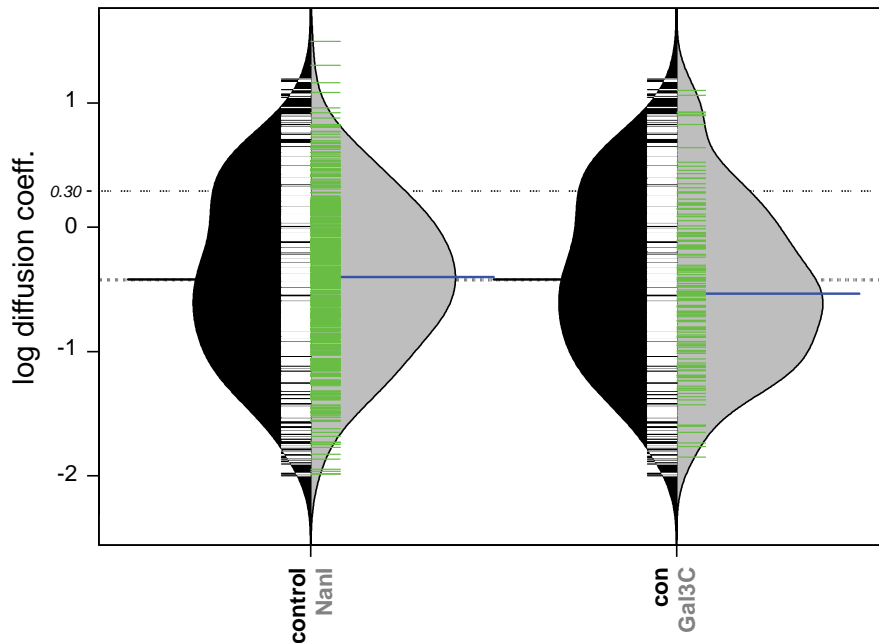

*Fig B: Lateral mobility of integrins with NanI and Gal-3C treatments*

The lateral mobility of integrins were determined using SPT, and the data from Table 1 are shown using a beanplot. Each sample population (grey) is shown compared to the control (black). The logarithmic median of the diffusion coefficients is indicated by a solid line for each population.<sup>3</sup> Each population is shown with a density estimate and horizontal lines indicate individual diffusion coefficient measurements. Diffusion coefficients are given as  $\log(D)$ , where  $D$  is in units of  $\times 10^{-10}$  [ $\text{cm}^2\text{s}^{-1}$ ] or  $\times 10^{-2}$  [ $\mu\text{m}^2\text{s}^{-1}$ ]. There is a notable decrease in the number of trajectories observed  $>2 \times 10^{-10}$  [ $\text{cm}^2\text{s}^{-1}$ ] in both conditions (indicated by the dashed line at 0.30).

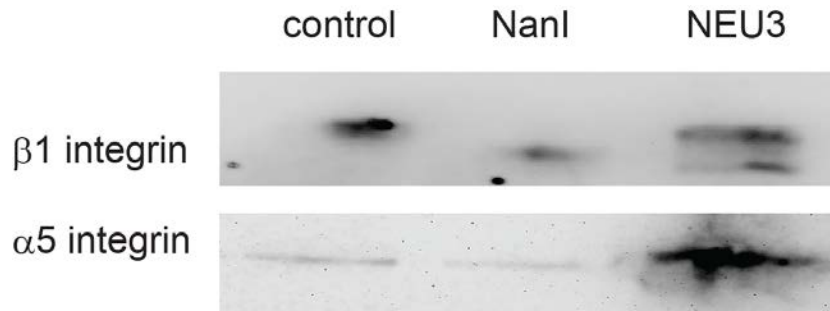

*Fig C: Changes in glycosylation to  $\alpha 5\beta 1$  integrin with NEU treatment*

To detect changes in the molecular weight of the  $\alpha 5\beta 1$  integrin receptor, we performed western blots of the protein isolated from HeLa cells. Briefly, cells were treated with the indicated enzyme condition for 3 h at 37 °C. Cells were harvested and lysed with lysis buffer (50 mM Tris, pH 8.0, 150 mM NaCl, 1% Triton X-100, 0.5% sodium deoxycholate, 0.1% SDS and a protease inhibitor cocktail). The lysate samples were concentrated and then separated by SDS-PAGE, and transferred to a nitrocellulose membrane. The membranes were probed with (top) anti-CD29 ( $\beta 1$  integrin chain; clone EP1041Y, Abcam), or (bottom) anti-CD49d ( $\alpha 5$  integrin chain; clone EPR7854, Abcam), and a goat anti-rabbit HRP secondary antibody (clone ab6721, Abcam). The blot was developed using ECL (Bio-Rad, USA). The blot is shown with the following conditions: lane 1, control; lane 2, NanI treatment (pH 4.5); lane 3: Neu3 (pH 4.5). Both lanes 2 and 3 show the appearance of a new, lower molecular weight, band for the  $\beta 1$  integrin consistent with desialylation of the integrin.<sup>4</sup> The  $\alpha 5$  chain did not show any apparent changes in molecular weight.

### *References*

- (1) Diehl, C., Genheden, S., Modig, K., Ryde, U., and Akke, M. (2009) Conformational entropy changes upon lactose binding to the carbohydrate recognition domain of galectin-3. *J. Biomol. NMR* 45, 157-169.
- (2) Hernandez Armada, D., Santos, J. T., Richards, M. R., and Cairo, C. W. (2015) Protecting group-free immobilization of glycans for affinity chromatography using glycosylsulfonohydrazide donors. *Carbohydr. Res.* 417, 109-116.
- (3) Kampstra, P. (2008) Beanplot: A boxplot alternative for visual comparison of distributions. *Journal of Statistical Software* 28, 1-9.
- (4) Jia, F., Howlader, M. A., and Cairo, C. W. (2016) Integrin-mediated cell migration is blocked by inhibitors of human neuraminidase. *Biochimica et Biophysica Acta (BBA) - Molecular and Cell Biology of Lipids* 1861, 1170-1179.
